# Supplementary material for: ATP binding and ATP hydrolysis in full-length MsbA monitored via time-resolved Fourier transform infrared spectroscopy
Source: publisher site journal article supplement (doi:10.1515/hsz-2023-0122), 2023-04-26

**Supplemental Information:**

**ATP binding and ATP hydrolysis in full-length MsbA monitored via time-resolved  
Fourier transform infrared spectroscopy**

Daniel Mann<sup>1,2</sup>, Kristin Labudda<sup>1,4</sup>, Sophie Zimmermann<sup>1</sup>, Kai Vocke<sup>1</sup>, Raphael Gasper<sup>1,3</sup>, Carsten Kötting<sup>1,4</sup> \* and Eckhard Hofmann<sup>1</sup> \*

<sup>1</sup> Department of Biophysics, Ruhr University Bochum, 44780 Bochum, Germany

<sup>2</sup> Ernst Ruska-Centre for Microscopy and Spectroscopy with Electrons (ER-C-3):  
Structural Biology, 52425 Jülich, Germany

<sup>3</sup> Max-Planck-Institute of Molecular Physiology, 44227 Dortmund, Germany

<sup>4</sup> Biospectroscopy, Center for Protein Diagnostics (PRODI), Ruhr University Bochum,  
44780 Bochum, Germany

\* shared corresponding authors

Running title: FTIR of full-length MsbA

To whom correspondence should be addressed:

Prof. Dr. Eckhard Hofmann, Protein Crystallography, Department of Biophysics, Ruhr-  
University Bochum, Universitätsstraße 150, 44780 Bochum, Germany, Telephone  
(+49)234 32 24463, E-mail: [eckhard.hofmann@ruhr-uni-bochum.de](mailto:eckhard.hofmann@ruhr-uni-bochum.de)

Dr. Carsten Kötting, Department of Biophysics, Ruhr University Bochum,  
Universitätsstraße 150, 44780 Bochum, Germany, Telephone (+49)234 32 18069, E-  
mail: [carsten.koetting@ruhr-uni-bochum.de](mailto:carsten.koetting@ruhr-uni-bochum.de)

**Figure S1: Valence structures of the photocaged nucleotides that were utilized in this study.** The photolabile NPE and pHP groups at the terminal phosphate of ATP, ADP and AppNHp were cleaved with a UV laser flash at 308 nm.

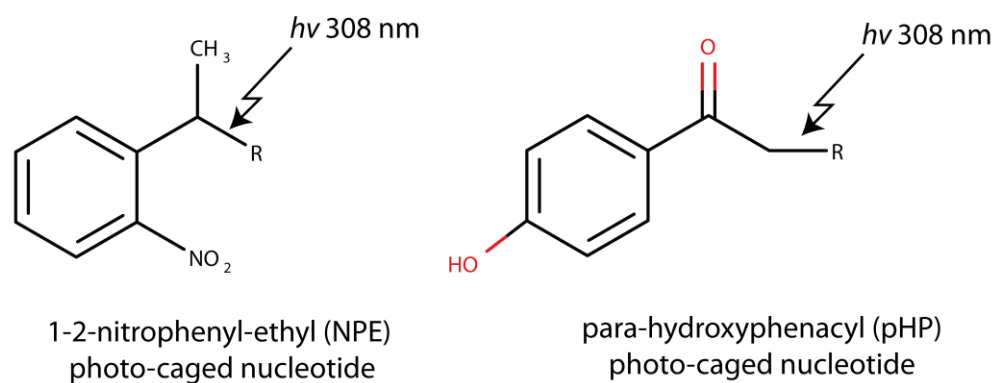

**R = ATP**

Adenosin-5'-triphosphate

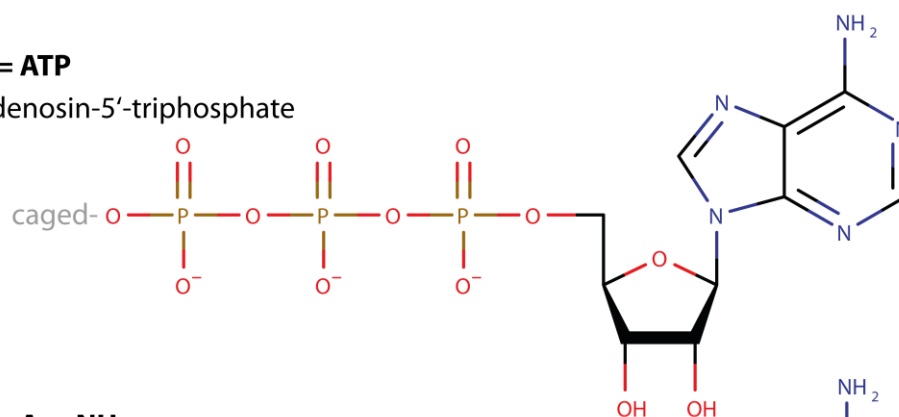

**R = AppNHp**

Adenosin-5'-[( $\beta,\gamma$ )-imido]triphosphate

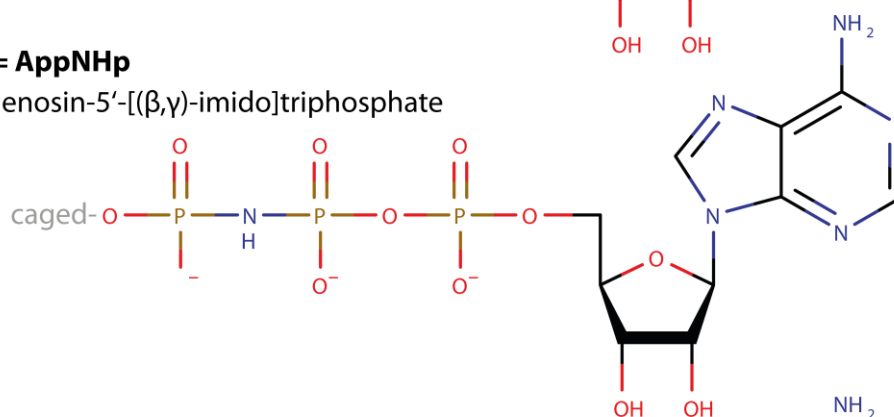

**R = ADP**

Adenosin-5'-diphosphate

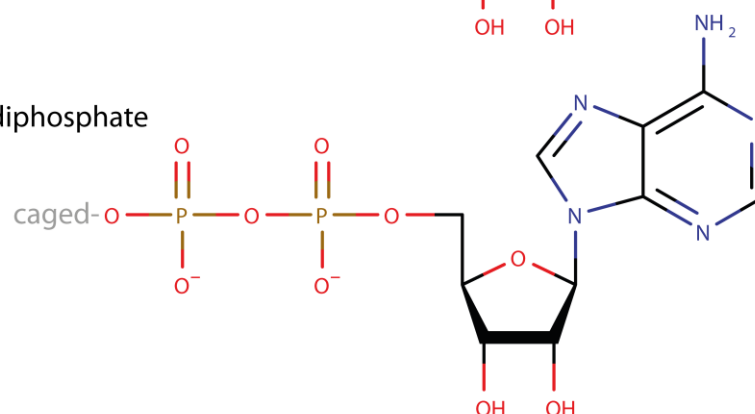



**Figure S2: Asymmetric stretching vibrations of a/b/g-ATP and a/b-ADP and their corresponding atom displacement vectors.** The depicted vibrations typically dominate the FTIR difference spectrum due to their high transition dipole moment.

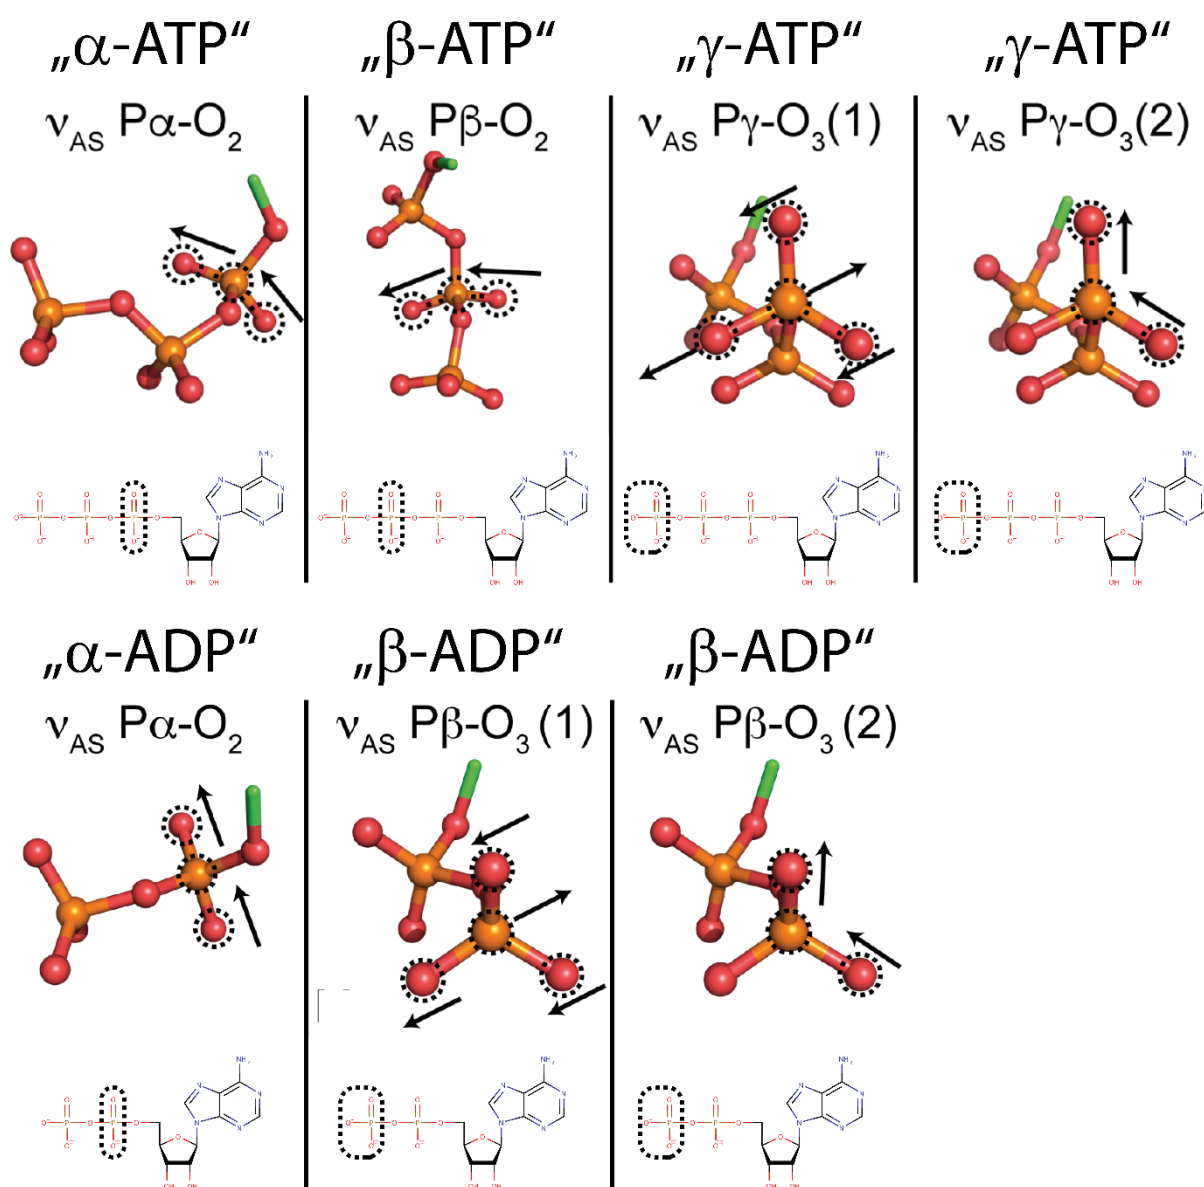

Supplement: Supplementary file 1 [file j_hsz-2023-0122_suppl_001.pdf]
